# Supplementary material
Source: Springer Nature journal article supplement (https://www.springermedizin.de/resource/supplementary/12936_2008_763_MOESM2_ESM.pdf/9548468)

● Hospital: both in- & out-patient data

■ Health center: both in- & out-patient data

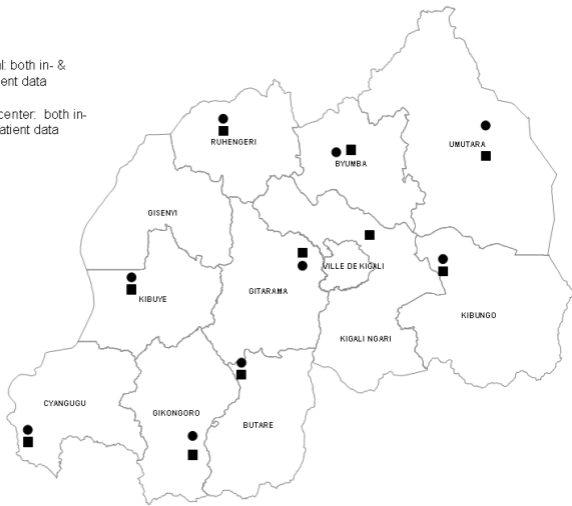

Supplement: MOESM2 [file 9548468]
